# Supplementary material for: Water induced morphological transformation of a poly(aryl ether) dendron amphiphile: helical fibers to nanorods, as light-harvesting antenna systems
Source: Royal Society of Chemistry journal article supplement (doi:10.1039/c7nr07663k), 2017-12-06
Supplement: c7nr07663k1.pdf [file c7nr07663k1.pdf]

*Supporting Information*

**Water Induced Morphological Transformation of a Poly(aryl ether)  
Dendron Amphiphile: Helical Fibers to Nanorods; as Light-  
Harvesting Antenna System**

**Arunava Maity,<sup>\*ab</sup> Ananta Dey,<sup>bc</sup> Monalisa Gangopadhyay<sup>ab</sup> and Amitava Das<sup>\*bc</sup>**

<sup>a</sup>*Organic Chemistry Division, CSIR-National Chemical Laboratory, Pune 411008,  
Maharashtra, India.*

<sup>b</sup>*Academy of Scientific and Innovative Research (AcSIR), New Delhi, India.*

<sup>c</sup>*CSIR-Central Salt & Marine Chemicals Research Institute, Bhavnagar, 364002,  
Gujarat, India.*

*E-mail: [a.maity@ncl.res.in](mailto:a.maity@ncl.res.in), [a.das@csmcri.res.in](mailto:a.das@csmcri.res.in)*



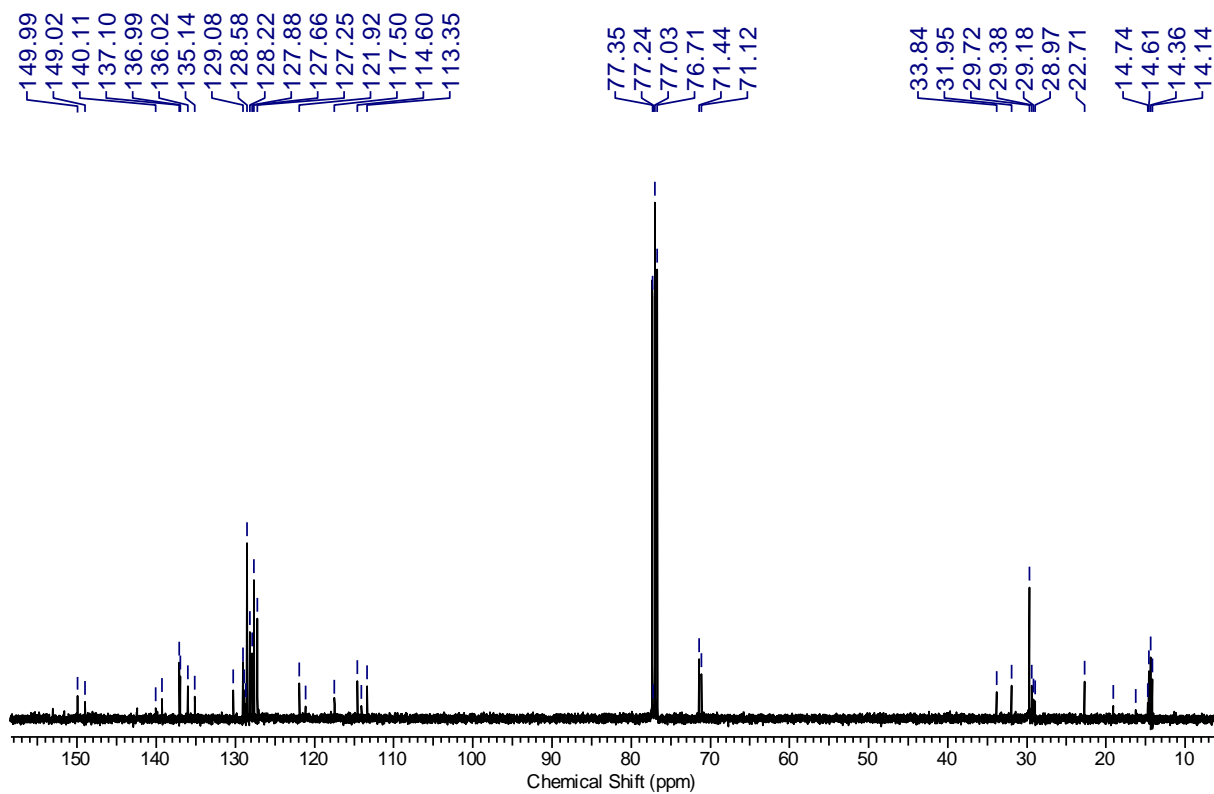

$^{13}\text{C}$  NMR (100 MHz) of the BODIPY based acceptor molecule **A-1** in  $\text{CDCl}_3$ .

AMB-3-74 #332 RT: 1.49 AV: 1 NL: 7.06E6  
T: FTMS + p ESIFull ms [100.00-1500.00]

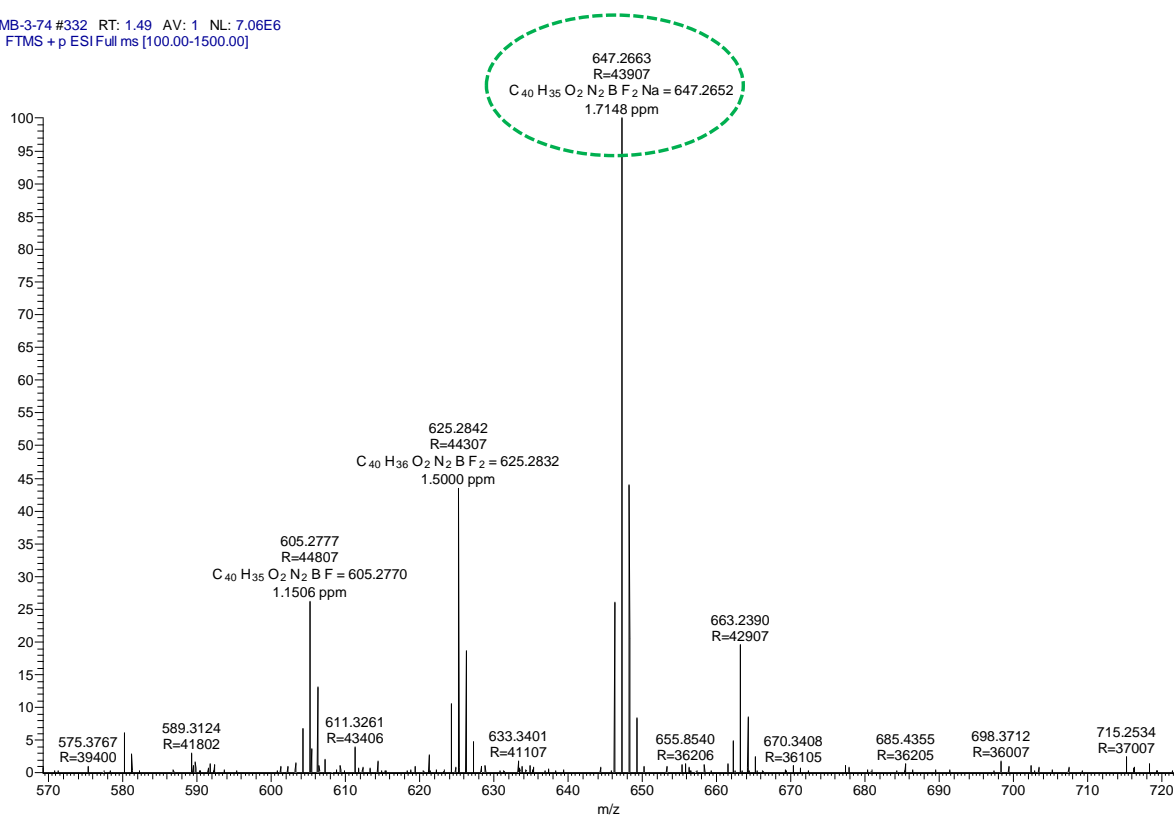

**HRMS (ESI)** spectrum of the BODIPY based acceptor molecule **A-1**.

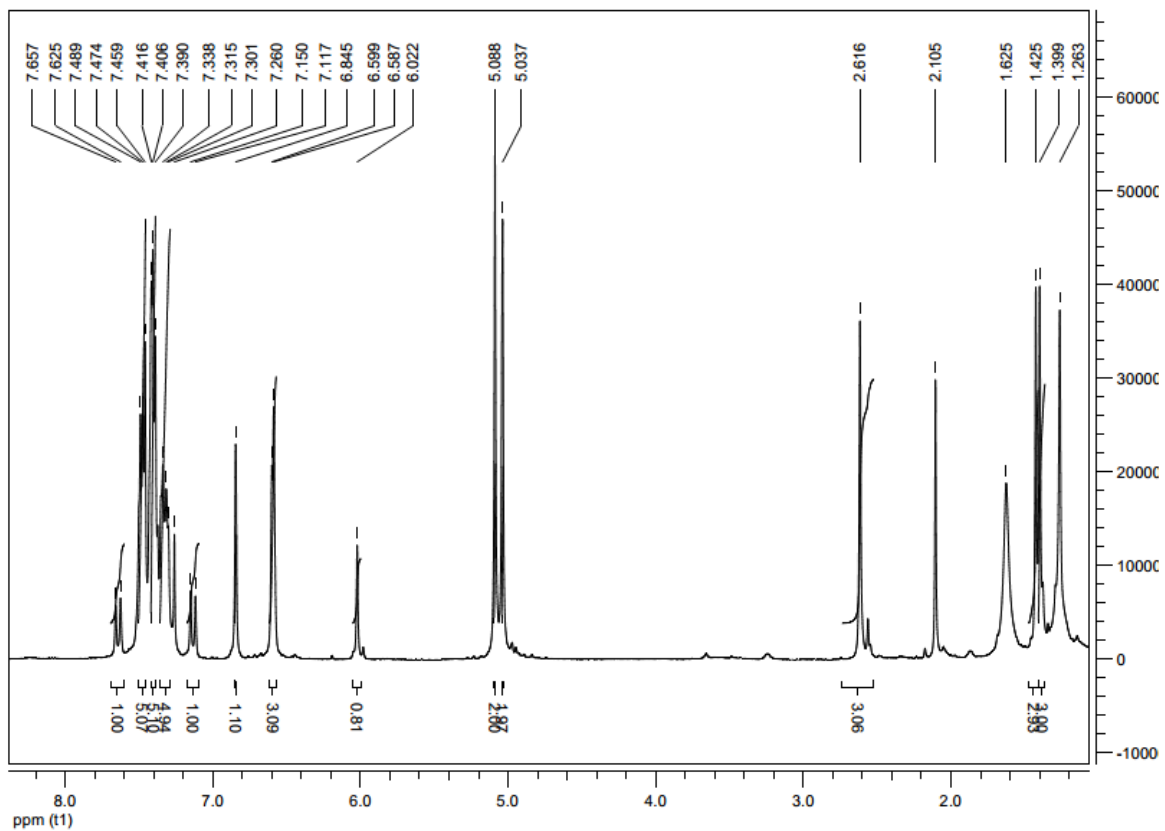

$^1\text{H}$  NMR (500 MHz) of the BODIPY based acceptor molecule **A-2** in  $\text{CDCl}_3$ .

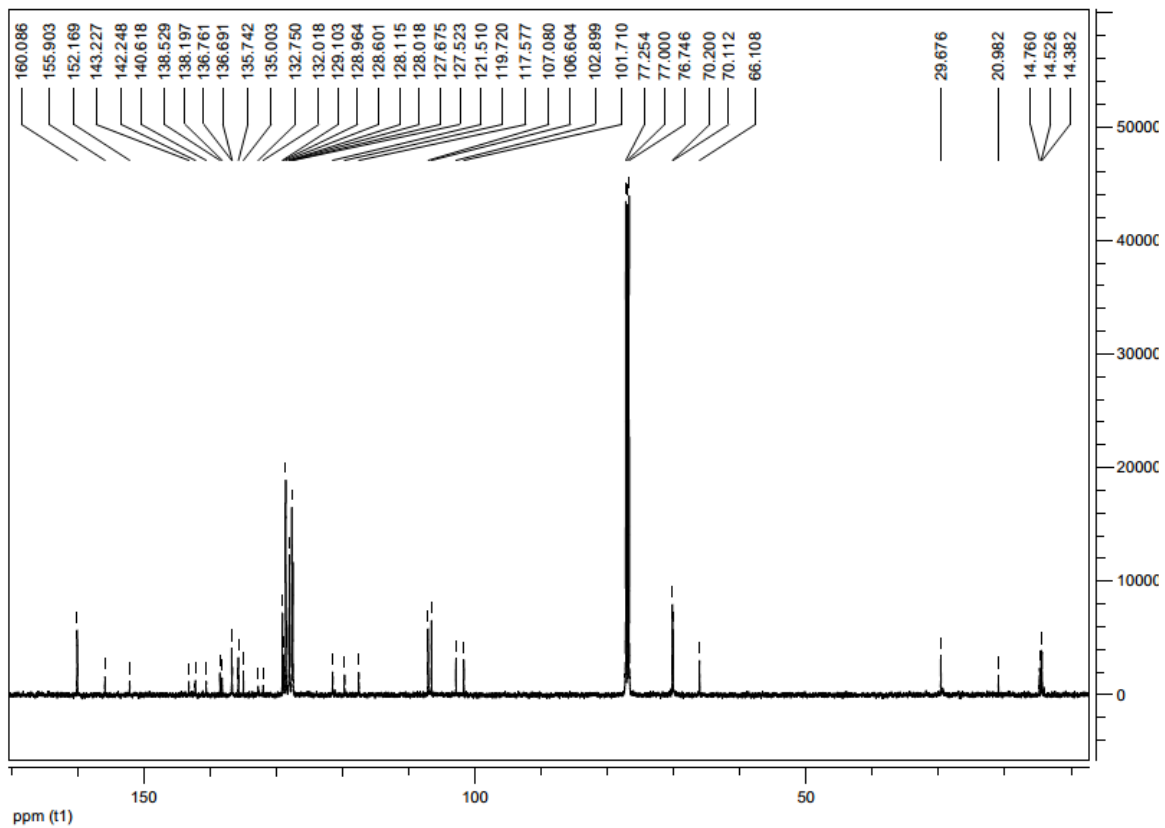

$^{13}\text{C}$  NMR (125 MHz) of the BODIPY based acceptor molecule **A-2** in  $\text{CDCl}_3$ .

AMB-3-74 #331 RT: 1.48 AV: 1 NL: 3.12E6  
T: FTMS + p ESI Full ms [100.00-1500.00]

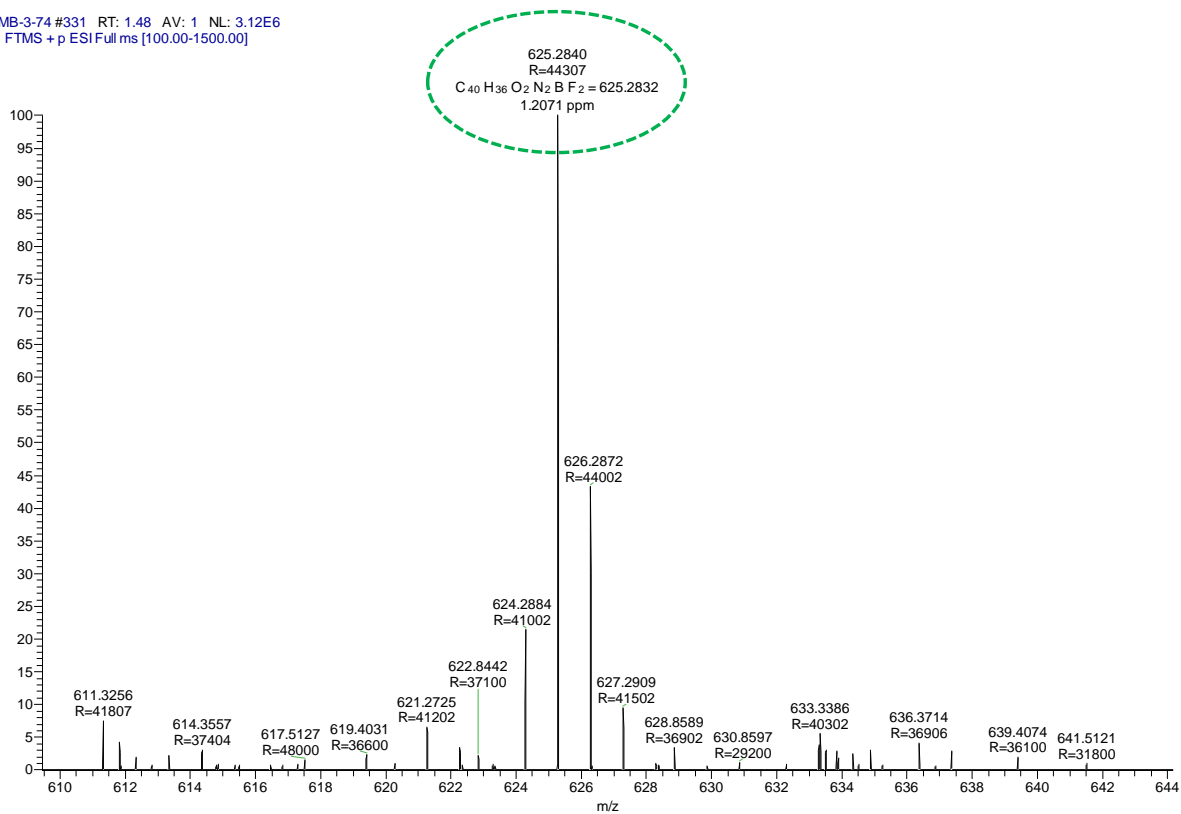

HRMS (ESI) spectrum of the BODIPY based acceptor molecule **A-2**.

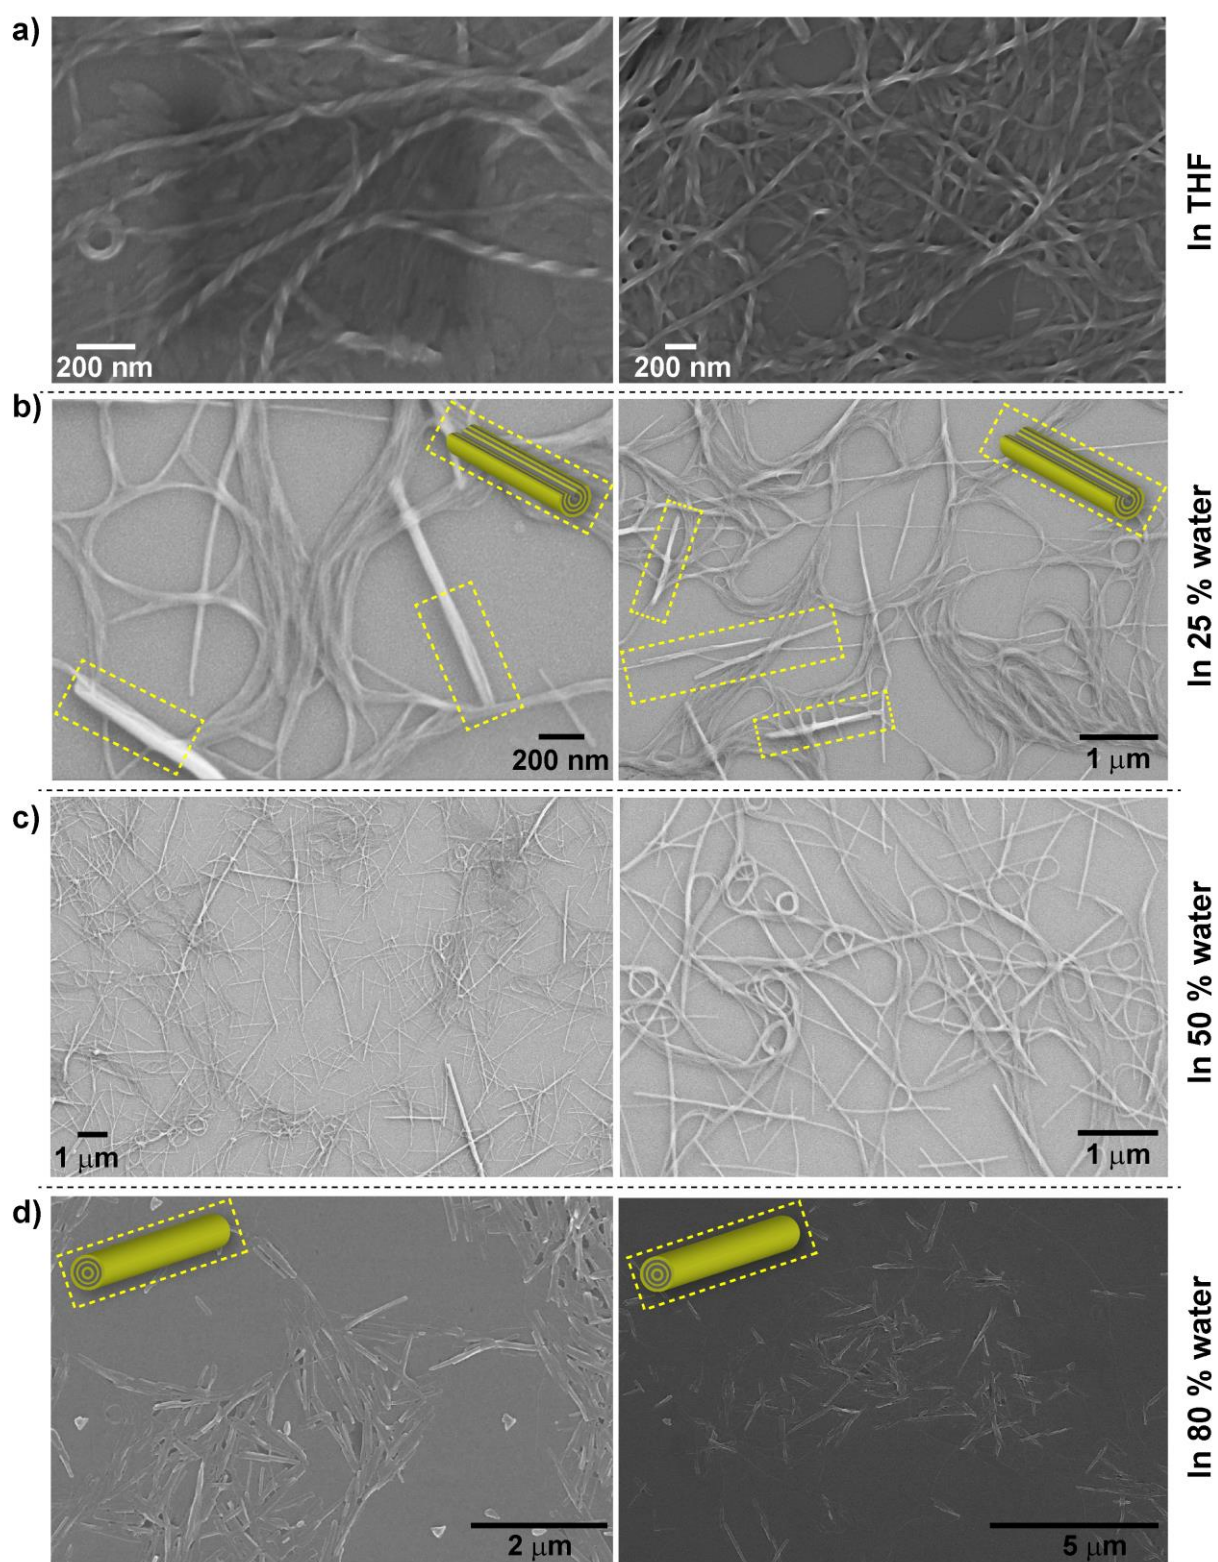

**Fig. S1:** FESEM Images of amphiphile **1(D)** (20 μM) nanostructures obtained from THF and THF/water mixed solvent content different percentage of water.



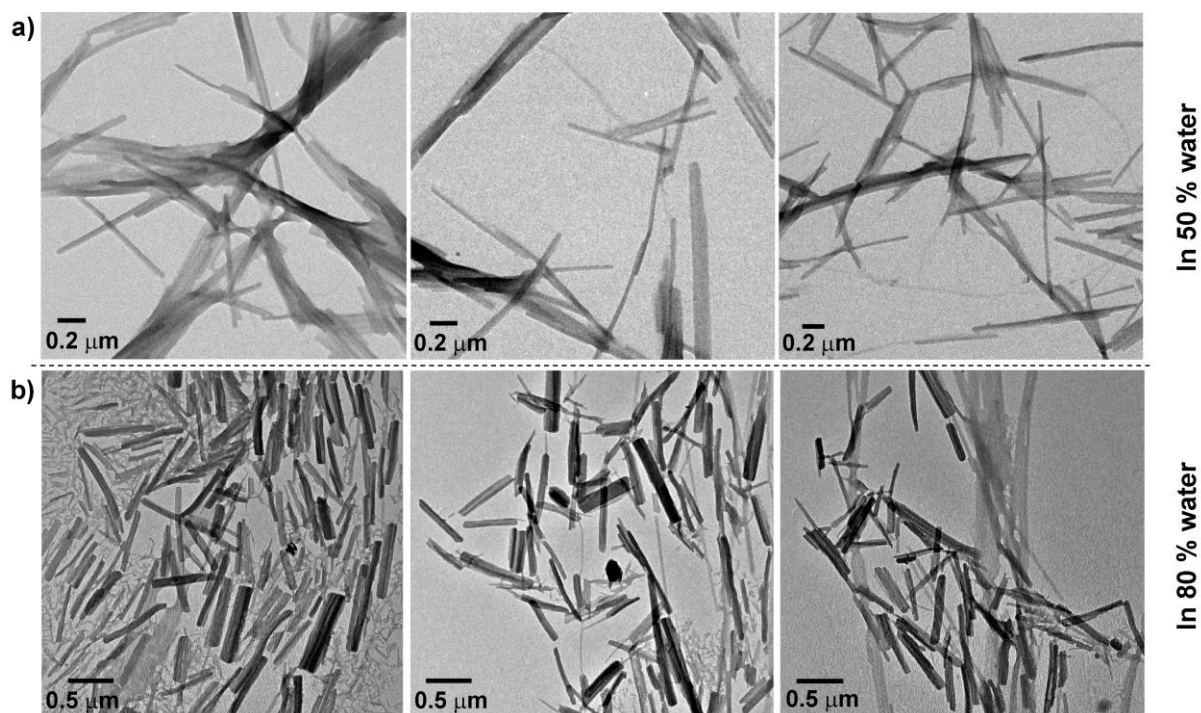

**Fig. S2** TEM images of the obtained nanorods of **1(D)** in THF/water mixed solvent content different percentage of water.

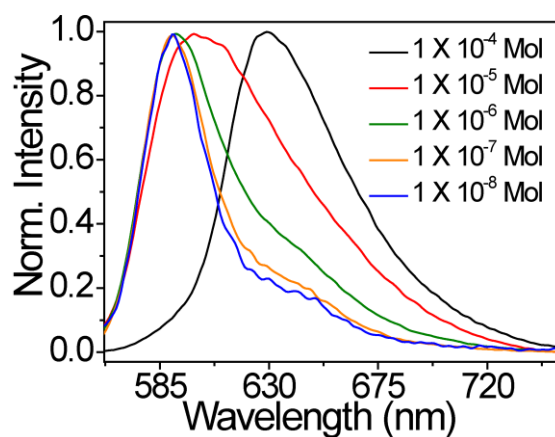

**Fig. S3:** Concentration dependent emission spectra of BODIPY based acceptor molecule **A-1** in THF/water mixed solvent content 80 % water ( $\lambda_{ex} = 545$  nm). With increasing the concentration of **A-1** the emission maxima shifted to longer wavelength, indicates **A-1** is self-aggregated in higher concentration range.

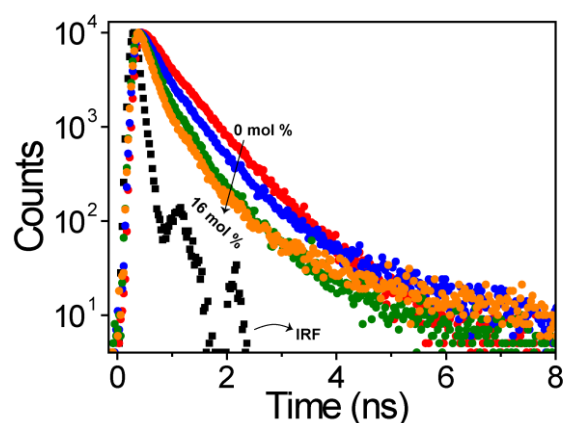

**Fig. S4:** Fluorescence lifetime decay profiles ( $\lambda_{\text{ex}} = 374 \text{ nm}$ , monitored at  $555 \text{ nm}$ ) of poly(aryl ether) dendron amphiphile **1(D)** on addition of different amounts of BODIPY acceptor **A-1** (0-16 mol %). IRF = instrument response function.

**Table S1:** Variation of the emission lifetime of **1(D)** with increase of 0 to 16 mol % of **A-1**.

| System                        | Monitoring wavelength (nm) | $\tau_1$          | $\tau_2$          | $\tau_3$         | $\tau_{\text{av}}$ |
|-------------------------------|----------------------------|-------------------|-------------------|------------------|--------------------|
| <b>1(D)</b> only              | 555                        | 0.39 ns<br>(77 %) | 0.85 ns<br>(23 %) | --               | 0.49 ns            |
| <b>1(D)</b> + 1 % <b>A-1</b>  | 555                        | 0.16 ns<br>(53 %) | 0.50 ns<br>(45 %) | 2.05 ns<br>(2%)  | 0.35 ns            |
| <b>1(D)</b> + 5 % <b>A-1</b>  | 555                        | 0.08 ns<br>(61 %) | 0.32 ns<br>(36 %) | 1.10 ns<br>(3%)  | 0.19 ns            |
| <b>1(D)</b> + 16 % <b>A-1</b> | 555                        | 0.09 ns<br>(71 %) | 0.36 ns<br>(27 %) | 1.50 ns<br>(2 %) | 0.17 ns            |

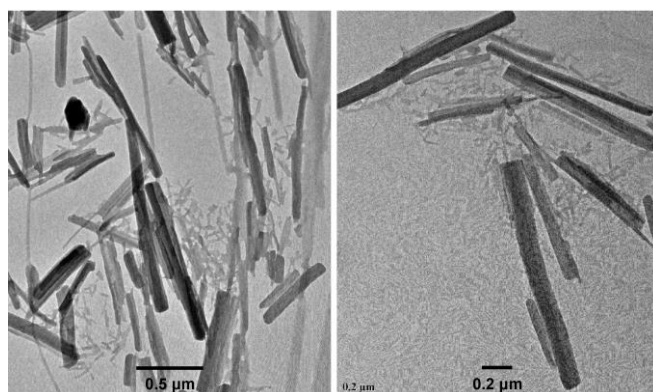

**Fig. S5:** TEM images shows the nanorod-shaped morphology of 20  $\mu\text{M}$  solution of **1(D)** in presence of 1.0 mol % **A-1**. Solvent used; THF/water mixed solvent (content 80 % water).

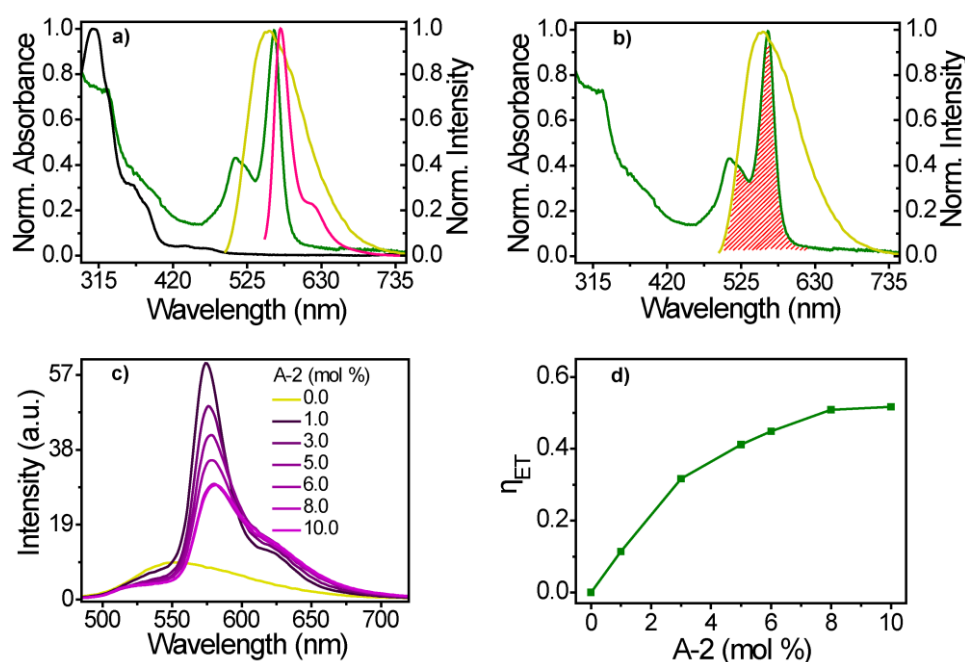

**Fig. S6:** (a) Absorption spectra of **1(D)** (black), **A-2** (green) and emission spectra of **1(D)** (yellow), **A-2** (magenta). (b) Spectral overlap of the emission of **1(D)** (yellow) and absorption of **A-2** (green) in THF/water mixed solvent content 80% water (concentration used 20  $\mu\text{M}$ , for both **1(D)** and **A-2**;  $\lambda_{\text{ex}} = 306$  nm for **1(D)** and 506 nm for **A-2**,  $l = 1$  cm). (c) Emission intensity ( $\lambda_{\text{ex}} = 306$  nm) of **1(D)** on addition of different mol % of **A-2** (0-10 mol %). (d) Energy transfer efficiency as a function of **A-2** concentration.

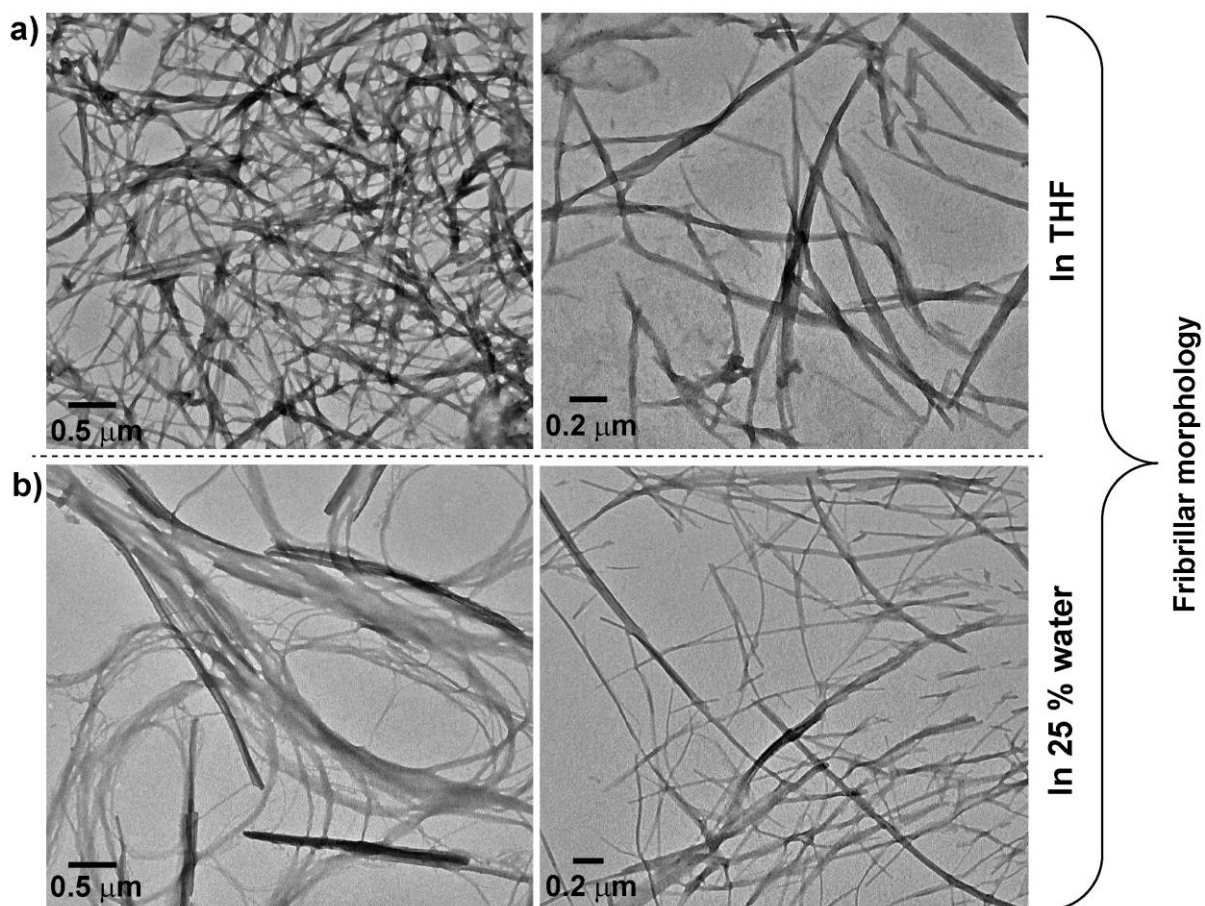

**Fig. S7:** TEM images of the fibrillar morphology of the poly(aryl ether) dendron amphiphile **1(D)** in THF and THF/water mixed solvent (20 μm).
